# Supplementary material for: Enhanced thermopower in rock-salt SnTe–CdTe from band convergence
Source: Royal Society of Chemistry journal article supplement (doi:10.1039/c6ra02658c), 2016-01-01
Supplement: c6ra02658c1.pdf [file c6ra02658c1.pdf]

## Enhanced thermopower in Rock-salt SnTe - CdTe from Band Convergence

Jun He<sup>a,b</sup>, Jingtao Xu<sup>\*b</sup>, Guoqiang Liu<sup>b</sup>, Hezhu Shao<sup>b</sup>, Xiaojian Tan<sup>b</sup>, Zhu Liu<sup>b</sup>, Jiaqiang Xu<sup>†a</sup>, Haochuan Jiang<sup>b</sup> and Jun Jiang<sup>b</sup>

<sup>a</sup> NEST Lab, Department of Chemistry, College of Sciences, Shanghai University, Shanghai 200444, China

<sup>b</sup> Ningbo Institute of Materials Technology and Engineering, Chinese Academy of Sciences, Ningbo 315201, China

Table S1. Room temperature densities ( $\rho$ ,  $g/cm^3$ ) for the SnCd<sub>x</sub>Te ( $x = 0 \sim 15\%$ ) samples investigated in this study.

| $x$    | 0    | 0.01 | 0.03 | 0.05 | 0.07 | 0.09 | 0.12 | 0.15 |
|--------|------|------|------|------|------|------|------|------|
| $\rho$ | 6.51 | 6.43 | 6.44 | 6.42 | 6.32 | 6.42 | 6.43 | 6.41 |

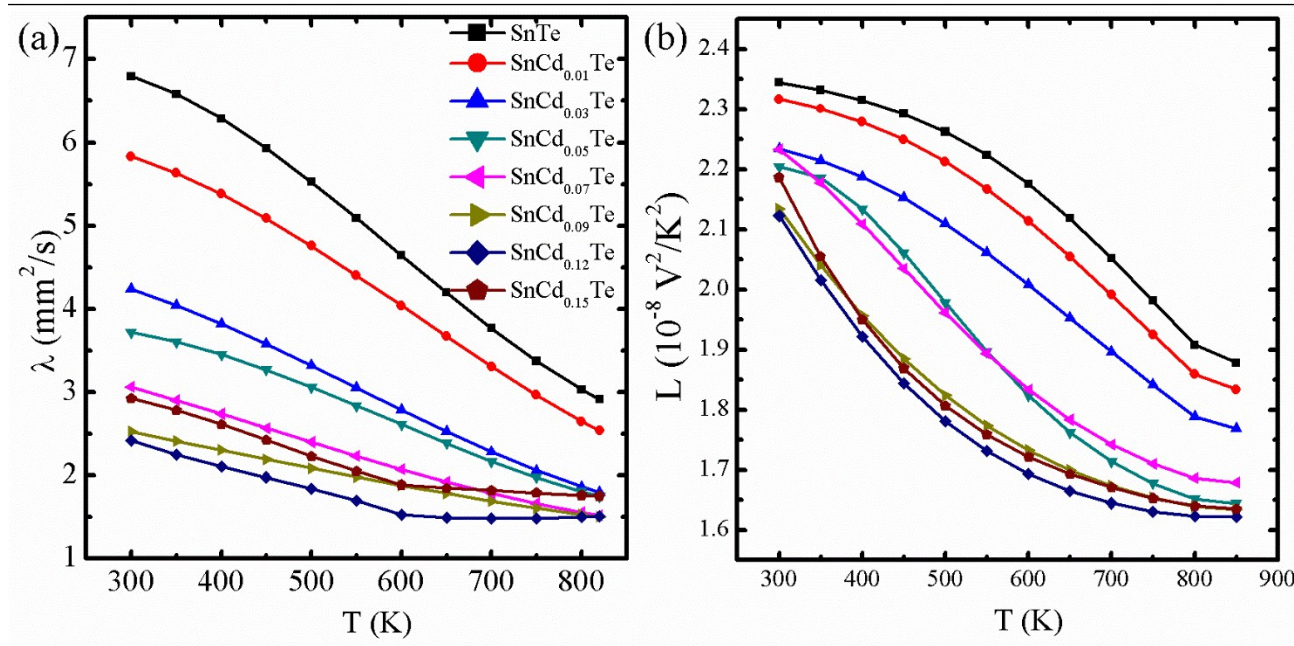

Fig S1. (a) Thermal diffusivity  $\lambda$  and (b) Lorenz number  $L$  as a function of temperature for SnCd<sub>x</sub>Te.

Table S2 the EDS results of the SnCd<sub>x</sub>Te samples in this work.

| $x$  | Sn<br>atom % | Te<br>atom % | Cd<br>atom % |
|------|--------------|--------------|--------------|
| 0.01 | 51.76        | 47.72        | 0.52         |
| 0.03 | 48.92        | 48.49        | 2.58         |
| 0.05 | 48.73        | 48.05        | 3.22         |
| 0.07 | 47.97        | 48.30        | 3.73         |

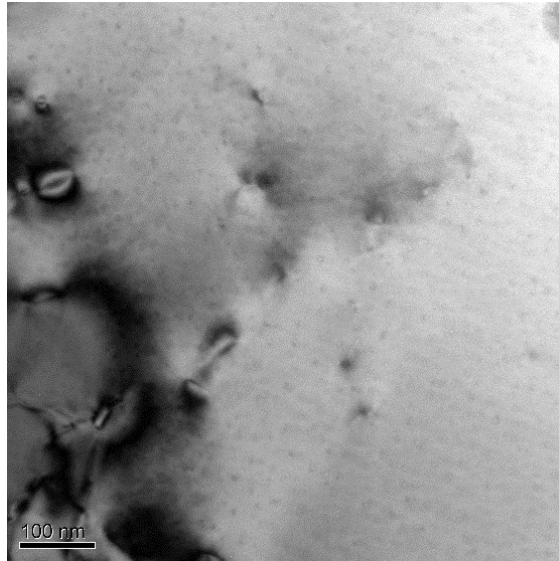

Fig S2. The TEM image for  $\text{SnCd}_{0.12}\text{Te}$ . Some dislocations are observed, and no second phase is found.

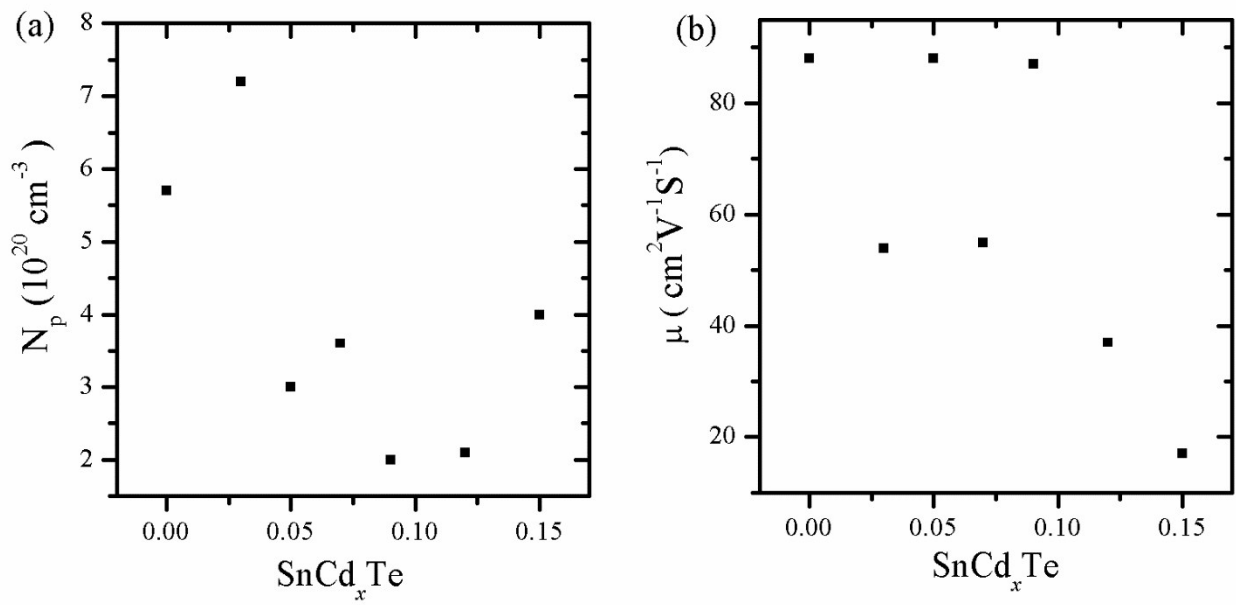

Fig S3. (a) Carrier concentration and (b) carrier mobility plot as a function of  $x$  at room temperature.
